# Supplementary material for: Design, synthesis and antiproliferative evaluation of tetrahydro-β-carboline histone deacetylase inhibitors bearing an aliphatic chain linker
Source: Royal Society of Chemistry journal article supplement (doi:10.1039/d4ra01672f), 2024-01-01

## Supporting Information for

### Design, Synthesis and Antiproliferative Evaluation of Tetrahydro- $\beta$ -carboline Histone Deacetylase Inhibitors Bearing an Aliphatic Chain Linker

Jing Shi<sup>a,b</sup>, Jiayun Wang<sup>c</sup>, Xingjie Wang<sup>d</sup>, Chao Qu<sup>d</sup>, Changchun Ye<sup>d</sup>, Xiuli Li<sup>b</sup>, Xin Chen<sup>c,\*</sup>, Zhengshui Xu<sup>a,\*</sup>

<sup>a</sup>Department of Thoracic Surgery, the Second Affiliated Hospital of Xi'an Jiaotong University, Xi'an, Shaanxi, 710004, China;

<sup>b</sup>Department of Respiratory and Endocrinology, the Second Affiliated Hospital of Xi'an Jiaotong University, Xi'an 710004, Shaanxi, China

<sup>c</sup>Shaanxi Key Laboratory of Natural Products & Chemical Biology, College of Chemistry & Pharmacy, Northwest A&F University, Yangling 712100, China

<sup>d</sup>Department of General Surgery, the First Affiliated Hospital of Xi'an Jiaotong University, Xi'an, 710061, Shaanxi, China

#### Corresponding Author

\*Zhengshui Xu

E-mail: [xuzhengshui@xjtu.edu.cn](mailto:xuzhengshui@xjtu.edu.cn); Fax: +86-029-87679000

\*Xin Chen

E-mail: [chenxin1888@nwsuaf.edu.cn](mailto:chenxin1888@nwsuaf.edu.cn); Fax: +87-029-87092335

1. <sup>1</sup>H-NMR and <sup>13</sup>C-NMR spectra of synthesized compounds of **9a-i** and **13a-j**.....Page 2-20.
2. The growth percent of compound **13d** in NCI-60 program.....Page 21.



(1*R*, 3*S*)-*N*-(6-(hydroxyamino)-6-oxohexyl)-1-(4-methoxyphenyl)-2, 3, 4, 9-tetrahydro-1*H*-pyrido[3, 4-*b*]indole-3-carboxamide (**9b**)

LT-1-2-1.20.fid

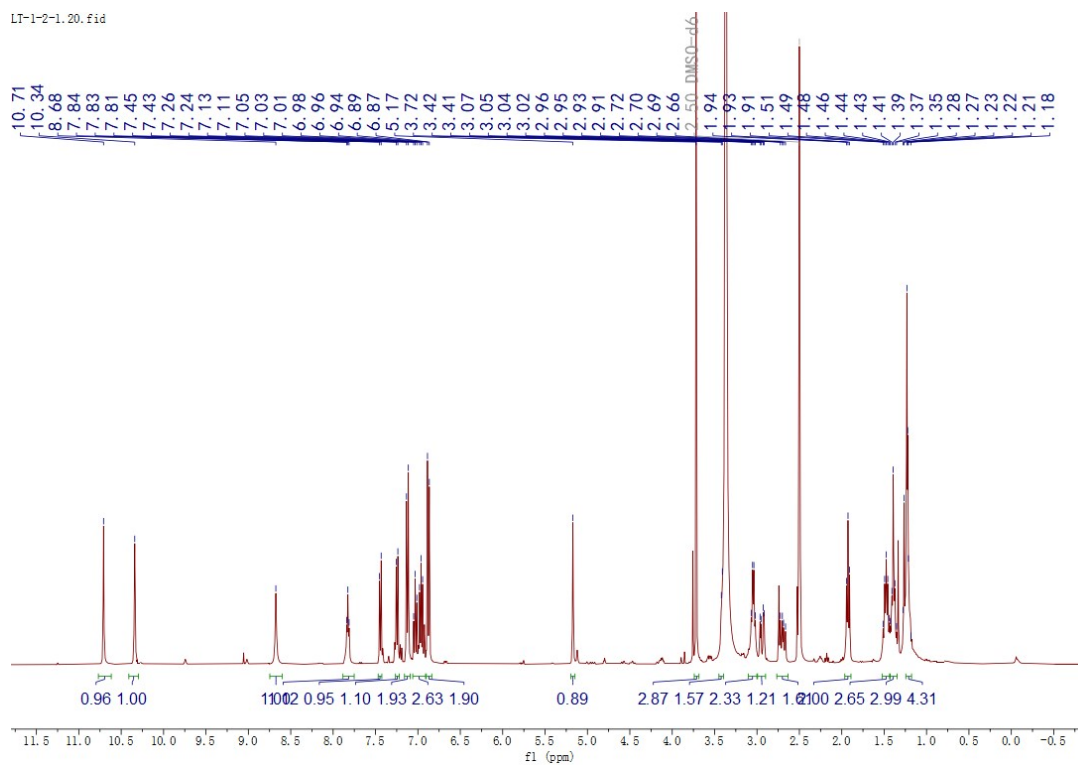

LT-1-2-1.30.fid

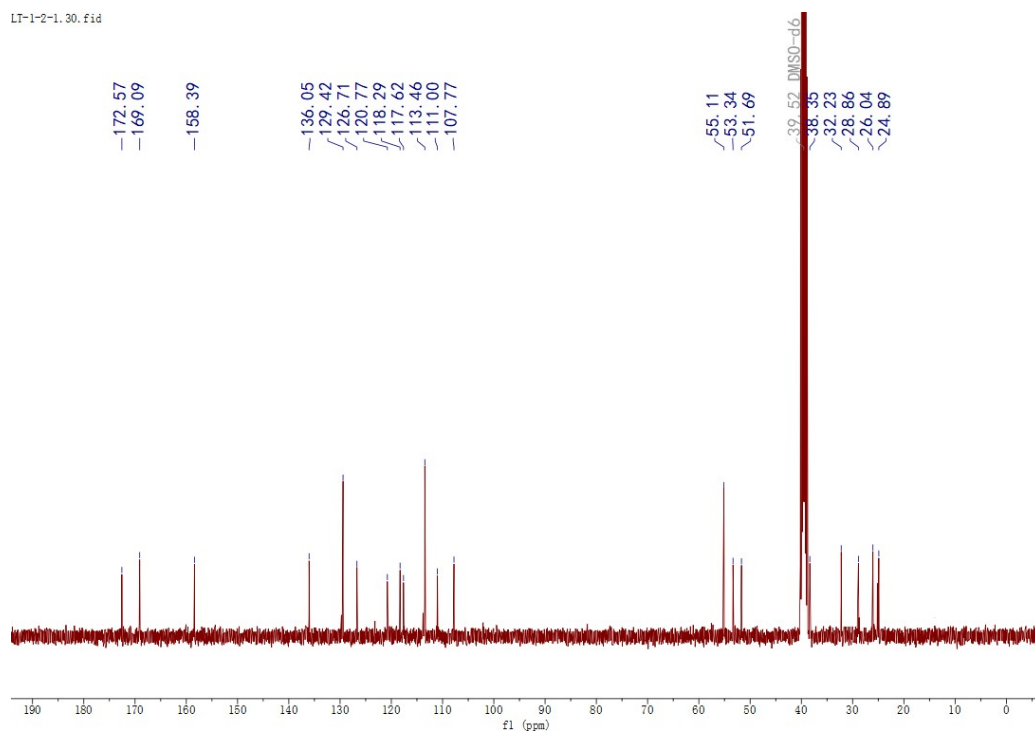

(1*R*, 3*S*)-*N*-(7-(hydroxyamino)-7-oxoheptyl)-1-(4-methoxyphenyl)-2, 3, 4, 9-tetrahydro-1*H*-pyrido[3, 4-*b*]indole-3-carboxamide (**9c**)

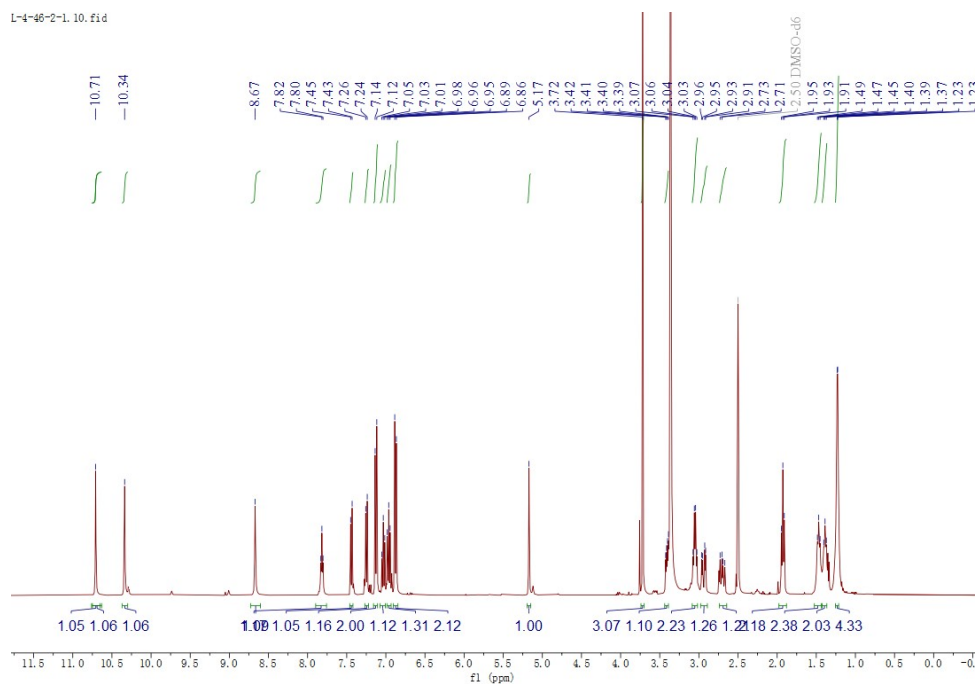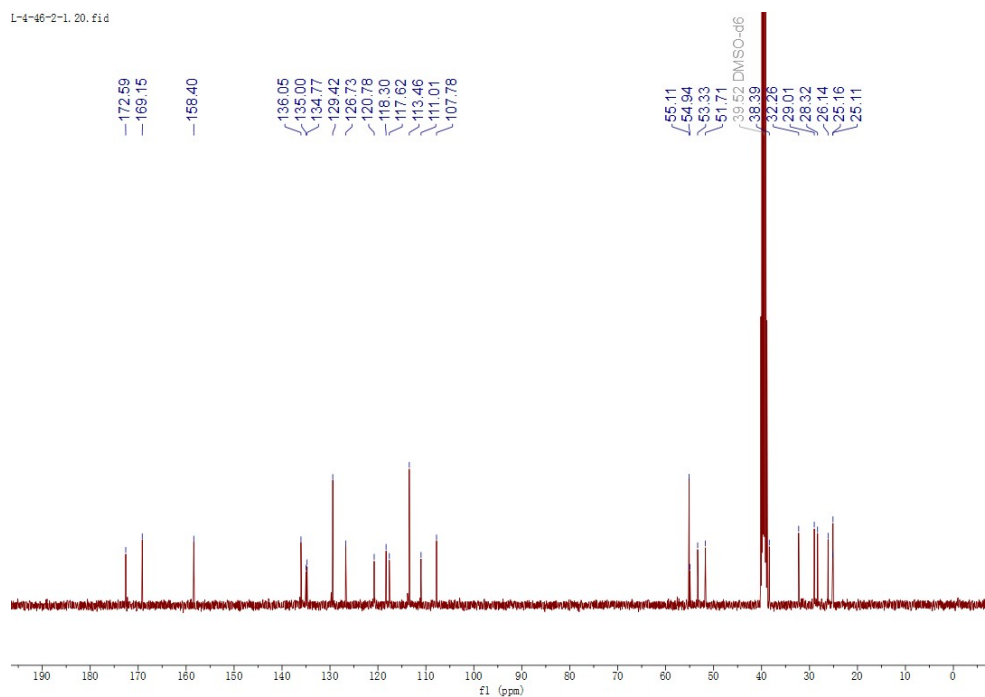

(1*R*, 3*S*)-*N*-(6-(hydroxyamino)-6-oxohexyl)-1-phenyl-2, 3, 4, 9-tetrahydro-1*H*-pyrido[3, 4-*b*]indole-3-carboxamide (**9d**)

LT-1-11-1-1.20.fid

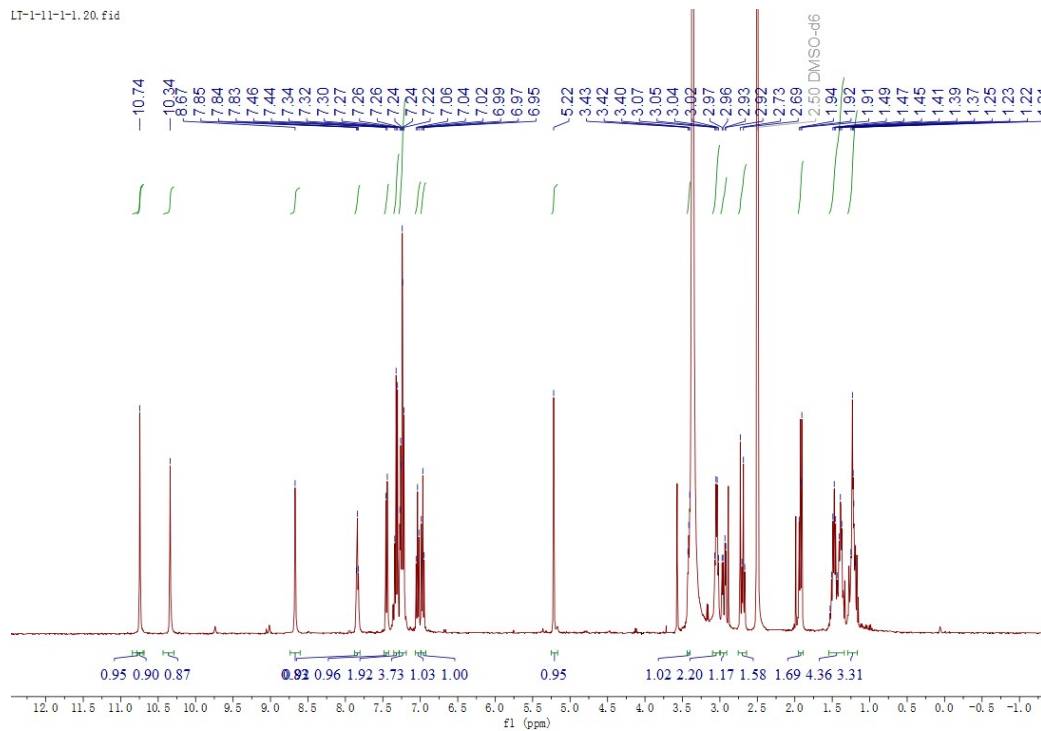

LT-1-11-1-1.30.fid

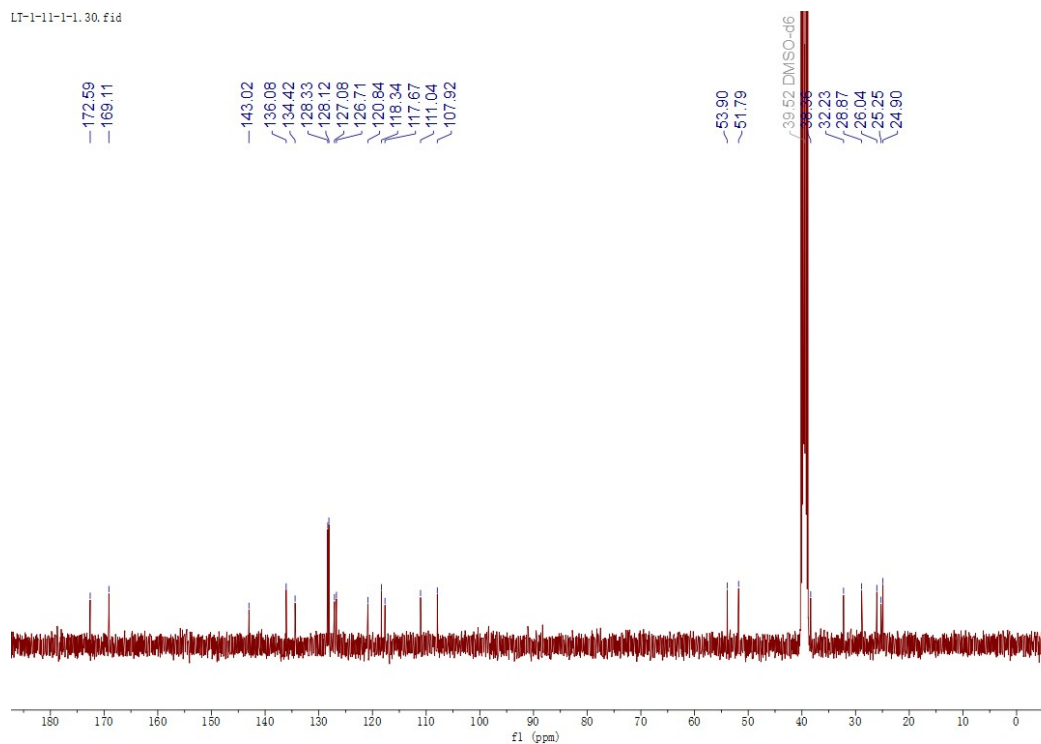

(1*R*, 3*S*)-*N*-(6-(hydroxyamino)-6-oxohexyl)-2-(4-methoxybenzyl)-1-methyl-2, 3, 4, 9-tetrahydro-1*H*-pyrido[3, 4-*b*]indole-3-carboxamide (**9e**)

D-73-1-1.10.fid

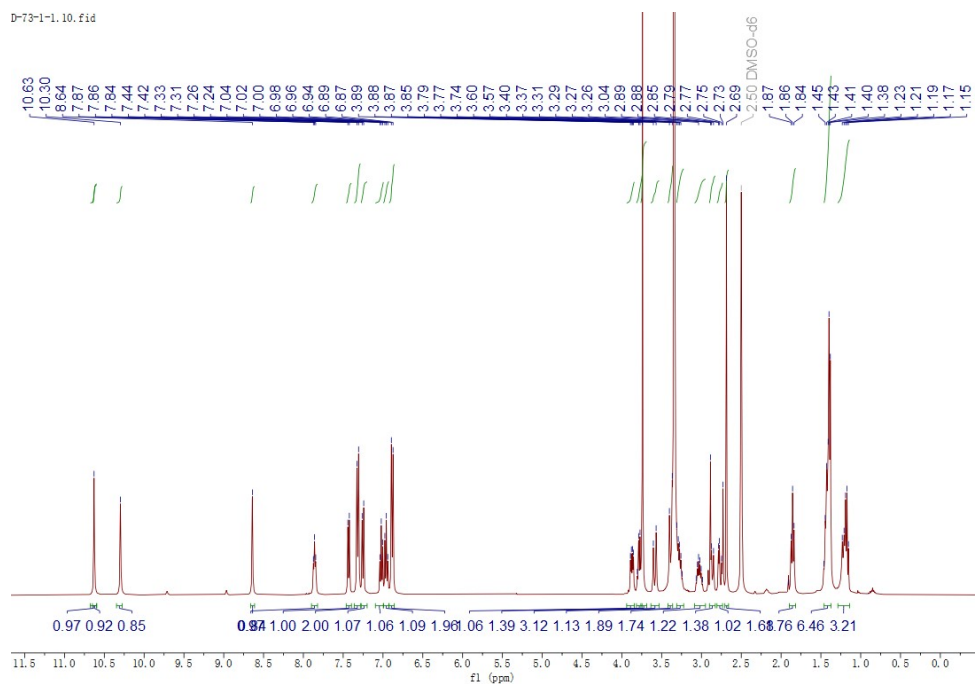

D-77-2-1.33.fid

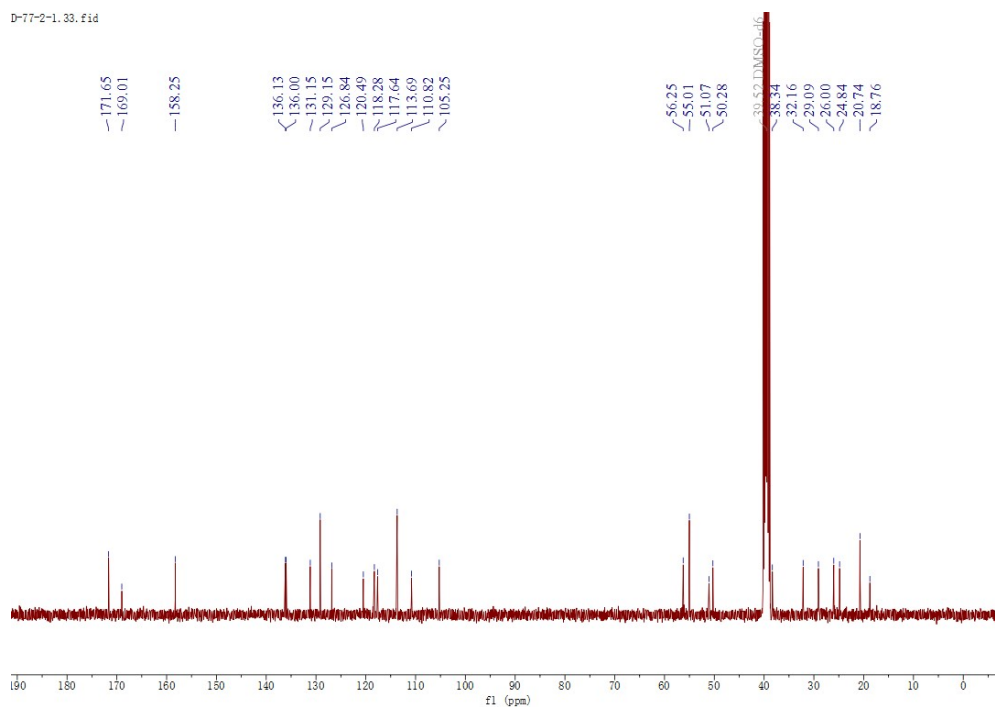

(1*R*, 3*S*)-*N*-(7-(hydroxyamino)-7-oxoheptyl)-2-(4-methoxybenzyl)-1-methyl-2, 3, 4, 9-tetrahydro-1*H*-pyrido[3, 4-*b*]indole-3-carboxamide (**9f**)

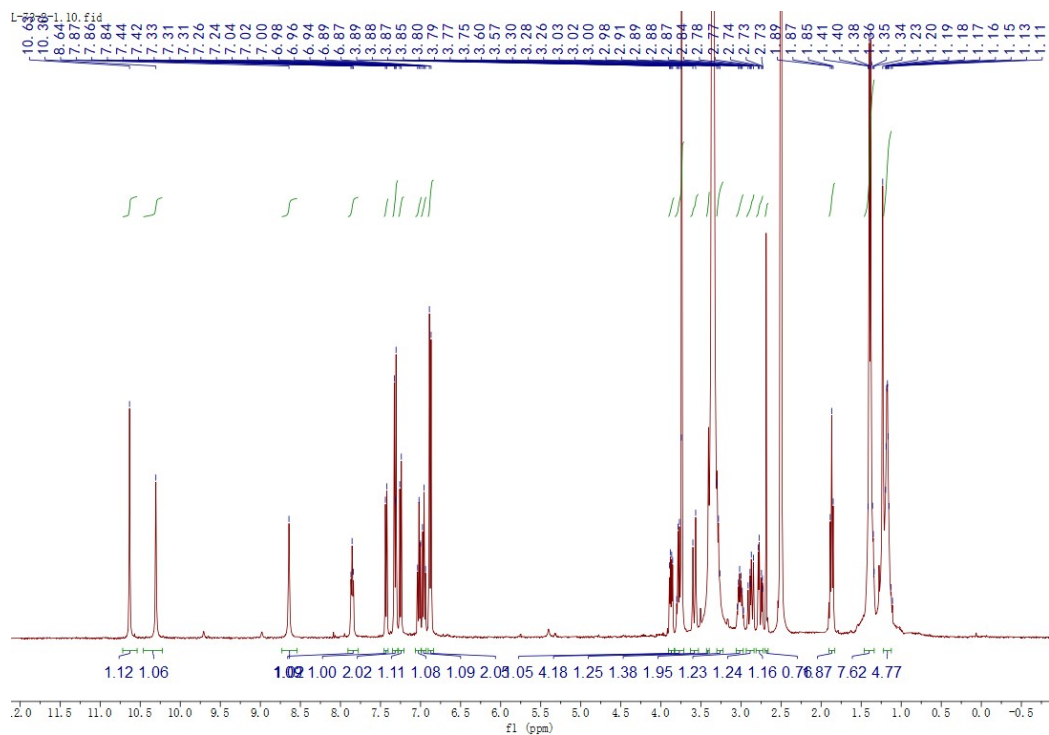

L-73-2-1.20.fid

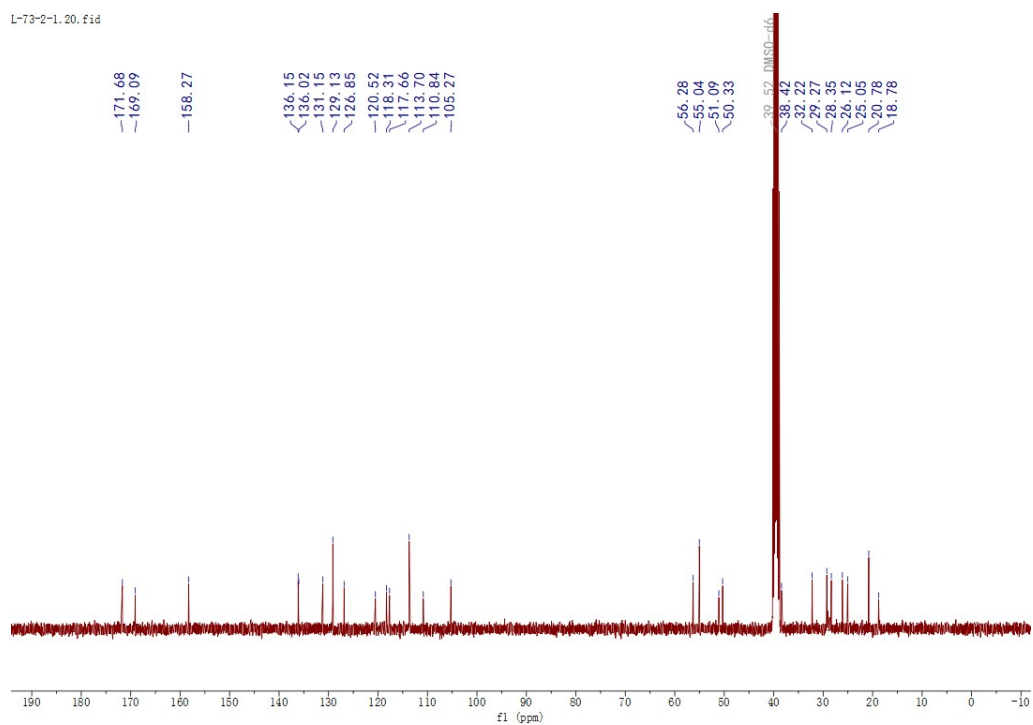

(1*R*, 3*S*)-1-(4-chlorophenyl)-*N*-(7-(hydroxyamino)-7-oxoheptyl)-2, 3, 4, 9-tetrahydro-1*H*-pyrido[3, 4-*b*]indole-3-carboxamide (**9g**)

L-4-35-2-1.10.fid

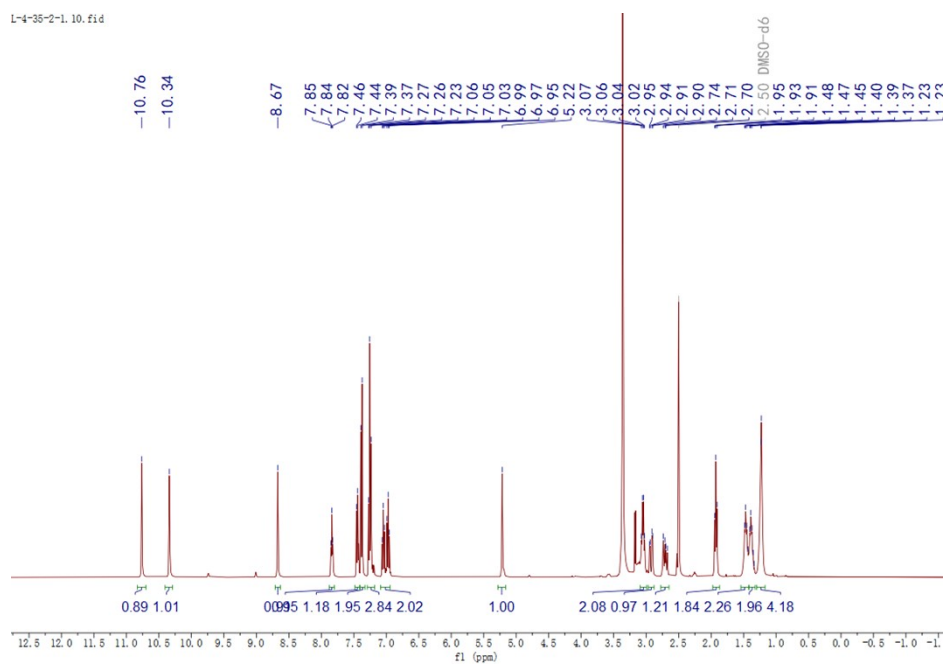

L-4-35-2-1.20.fid

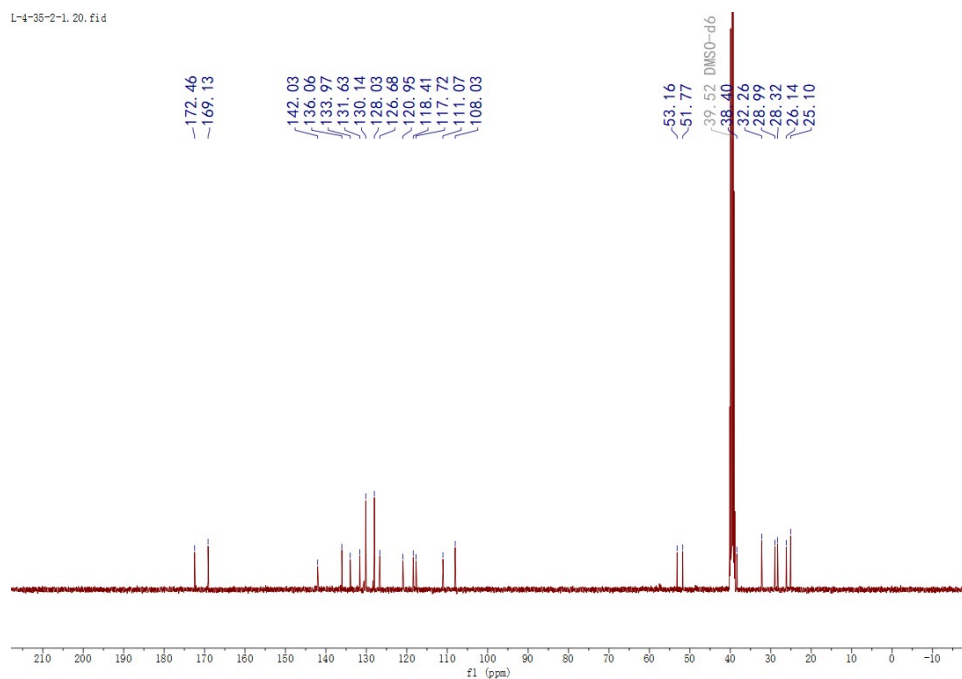



(1*R*, 3*S*)-1-(3, 4-dimethoxyphenyl)-*N*-(7-(hydroxyamino)-7-oxoheptyl)-2, 3, 4, 9-tetrahydro-1*H*-pyrido[3, 4-*b*]indole-3-carboxamide (**9h**)

L-4-52-2-1.10.fid

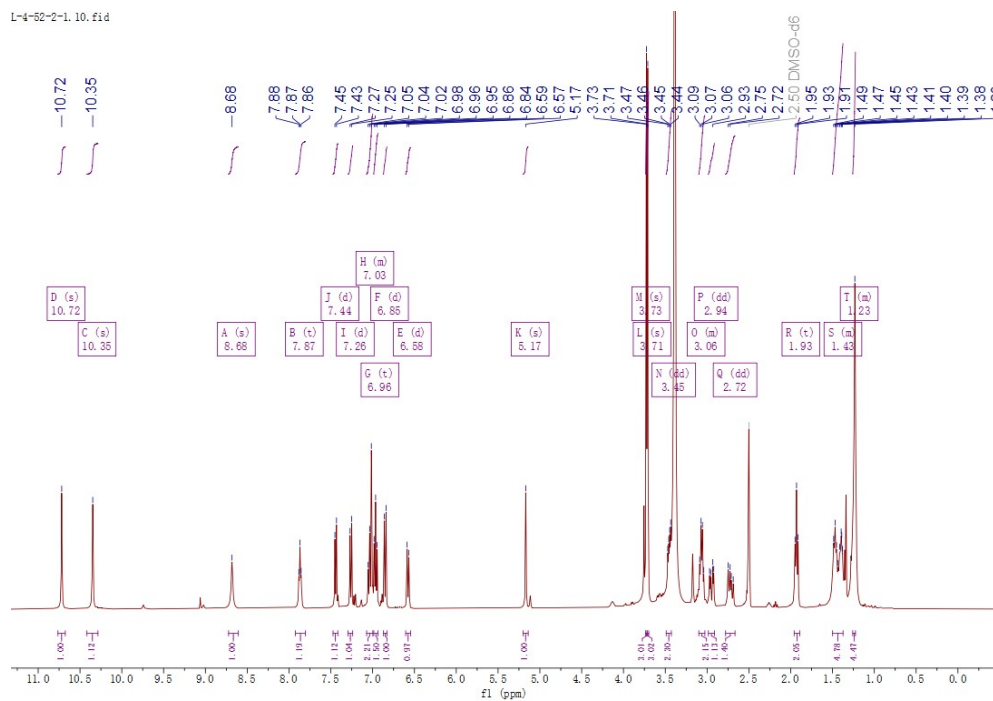

L-4-52-2-1.20.fid

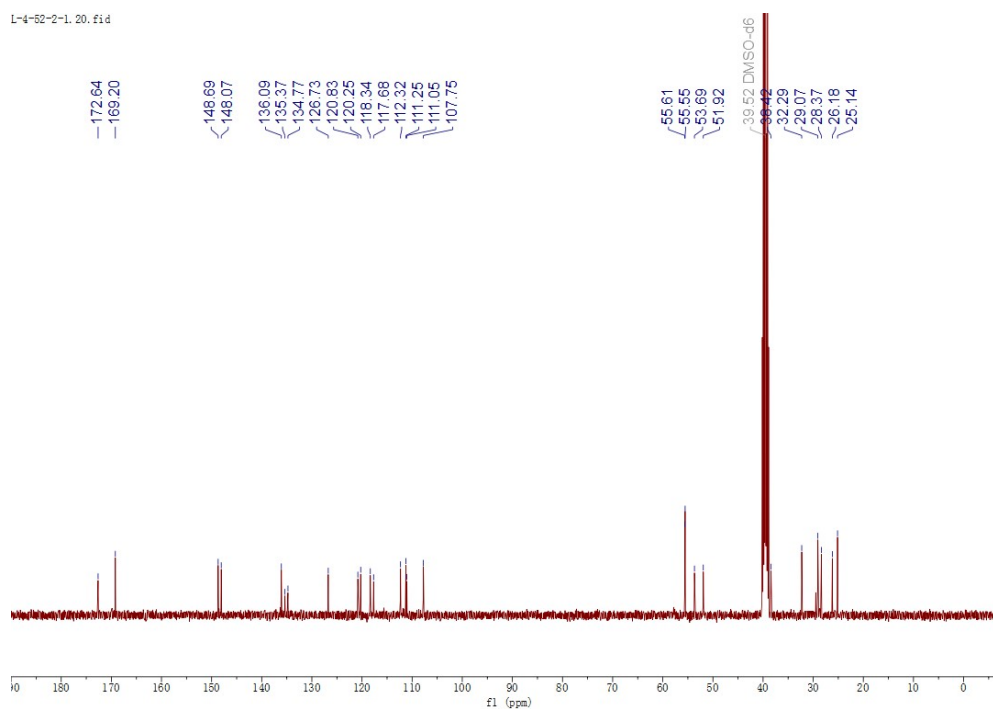



(*R*)-*N*-(7-(hydroxyamino)-7-oxoheptyl)-2-(4-methoxybenzyl)-2, 3, 4, 9-tetrahydro-1*H*-pyrido[3, 4-*b*]indole-3-carboxamide (**13a**)

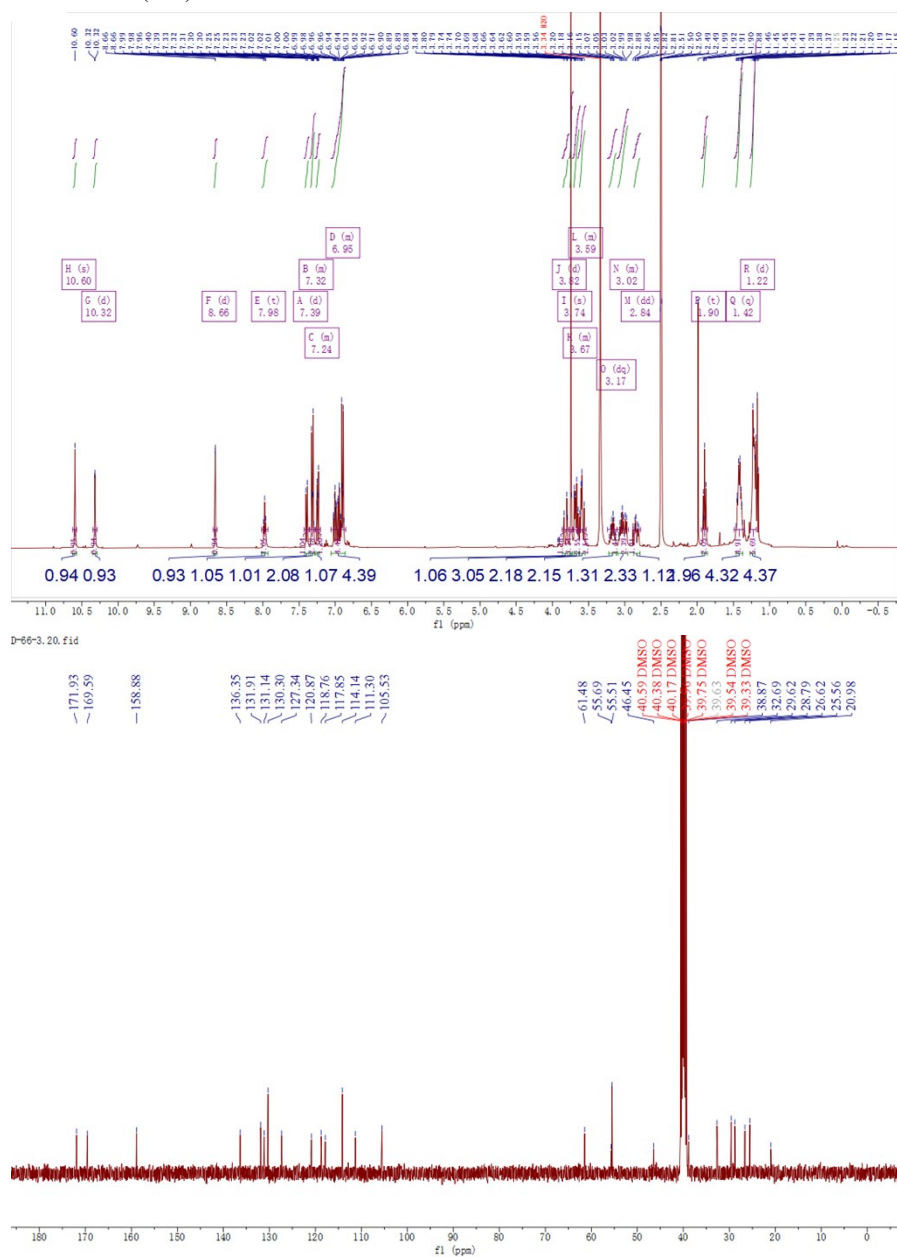

(1*S*, 3*R*)-*N*-(6-(hydroxyamino)-6-oxohexyl)-1-(4-methoxyphenyl)-2, 3, 4, 9-tetrahydro-1*H*-pyrido[3, 4-*b*]indole-3-carboxamide (**13b**)

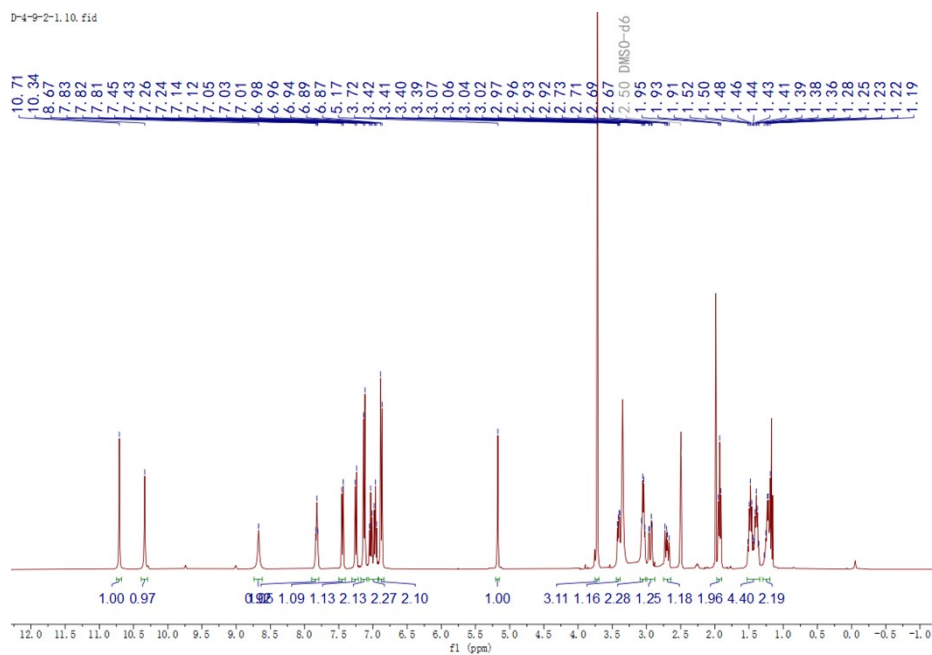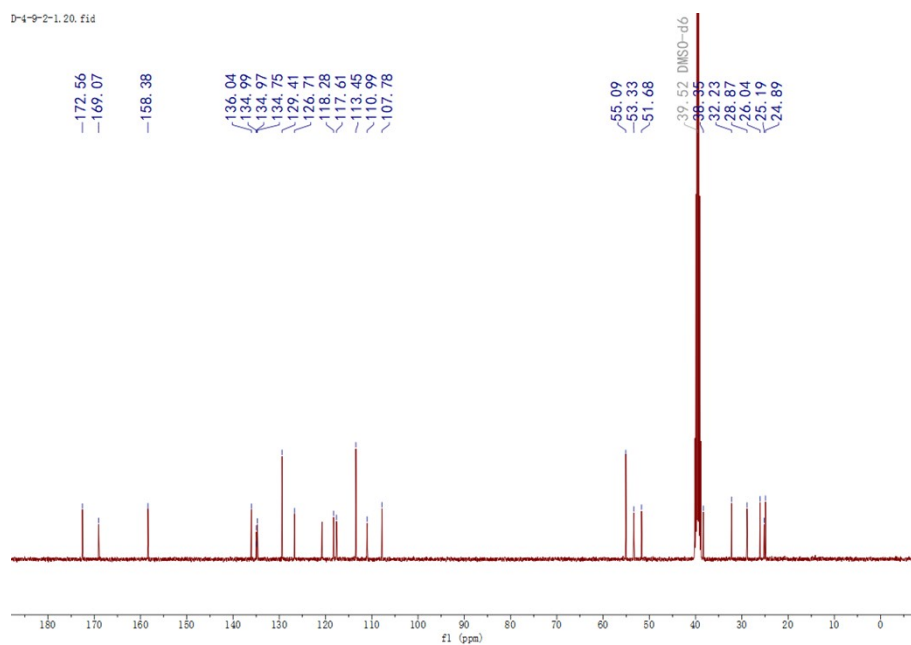

(1*S*, 3*R*)-*N*-(7-(hydroxyamino)-7-oxoheptyl)-1-(4-methoxyphenyl)-2, 3, 4, 9-tetrahydro-1*H*-pyrido[3, 4-*b*]indole-3-carboxamide (**13c**)

D-4-10-2-1.10.fid

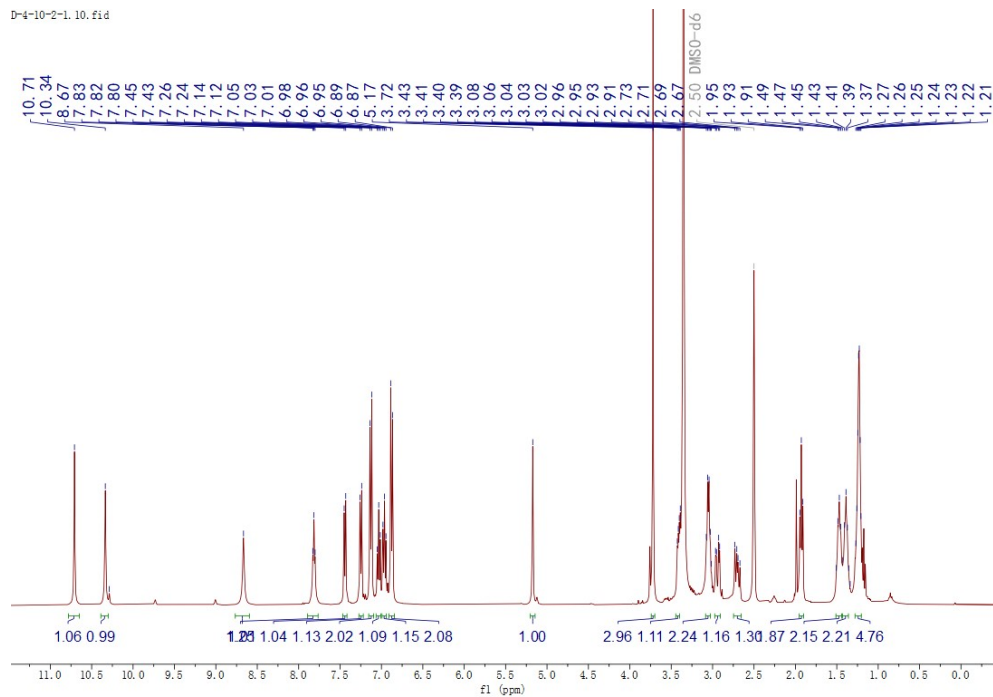

D-4-10-2-1.20.fid

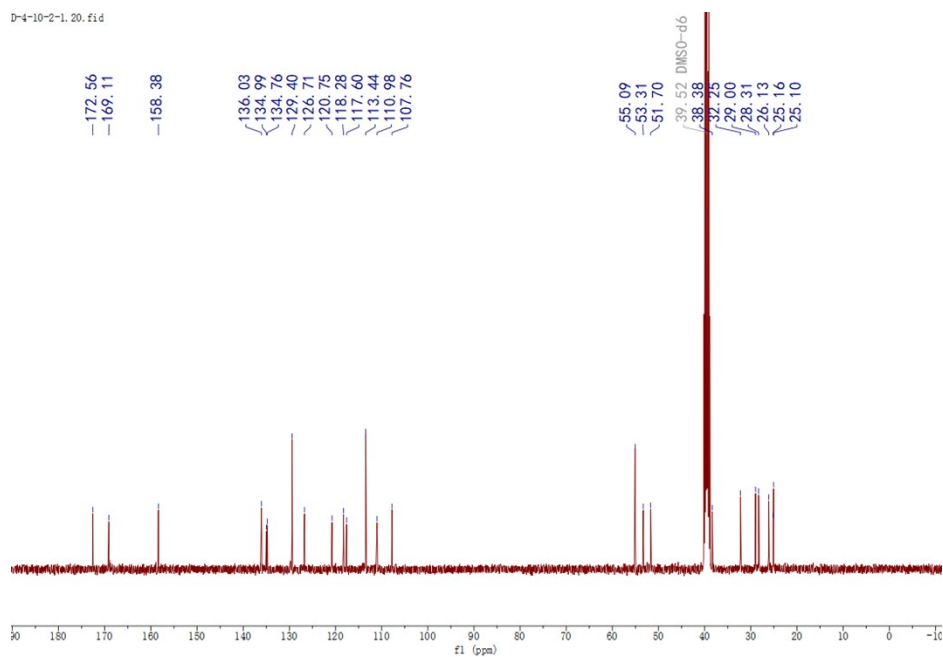

(1*S*, 3*R*)-1-cyclopropyl-*N*-(7-(hydroxyamino)-7-oxoheptyl)-2-(4-methoxybenzyl)-2, 3, 4, 9-tetrahydro-1*H*-pyrido[3, 4-*b*]indole-3-carboxamide (**13d**)

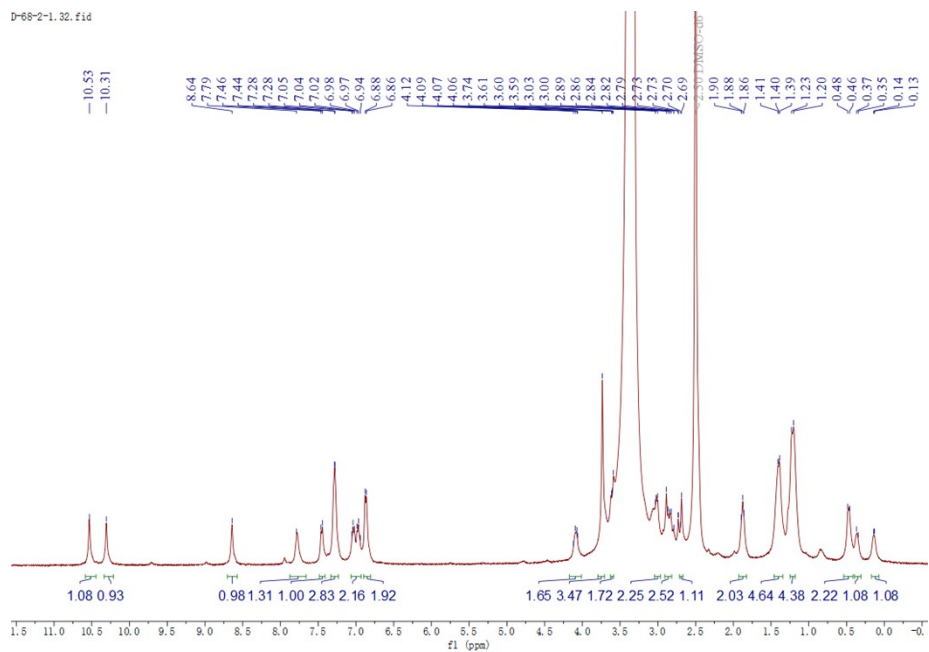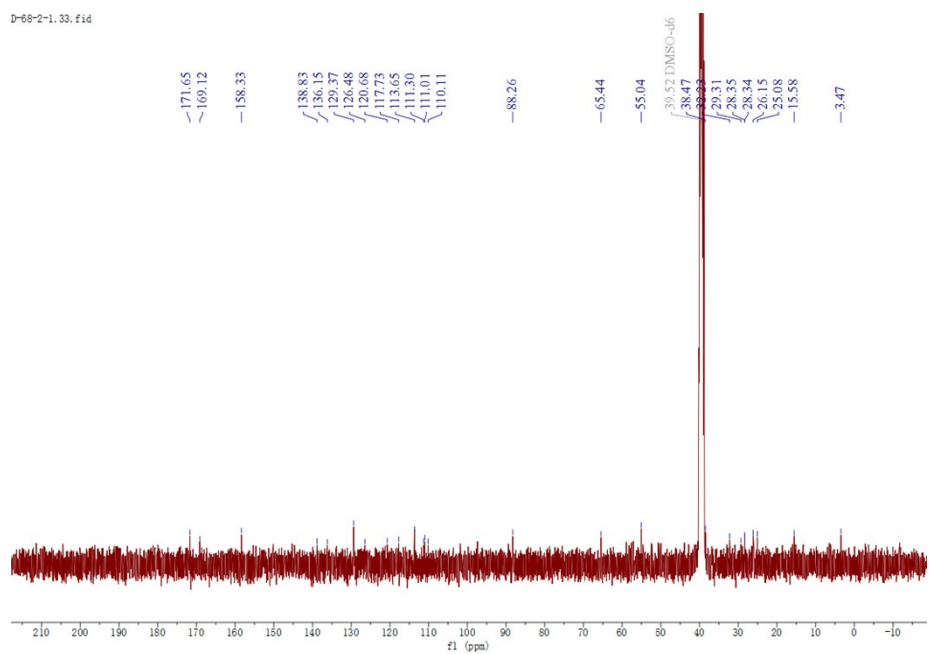

(1*S*, 3*R*)-*N*-(6-(hydroxyamino)-6-oxohexyl)-2-(4-methoxybenzyl)-1-methyl-2, 3, 4, 9-tetrahydro-1*H*-pyrido[3, 4-*b*]indole-3-carboxamide (**13e**)

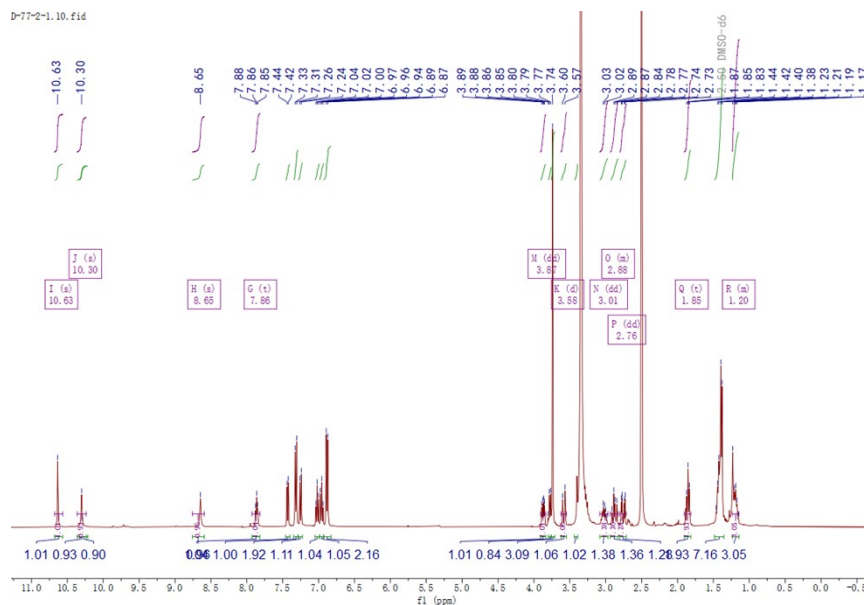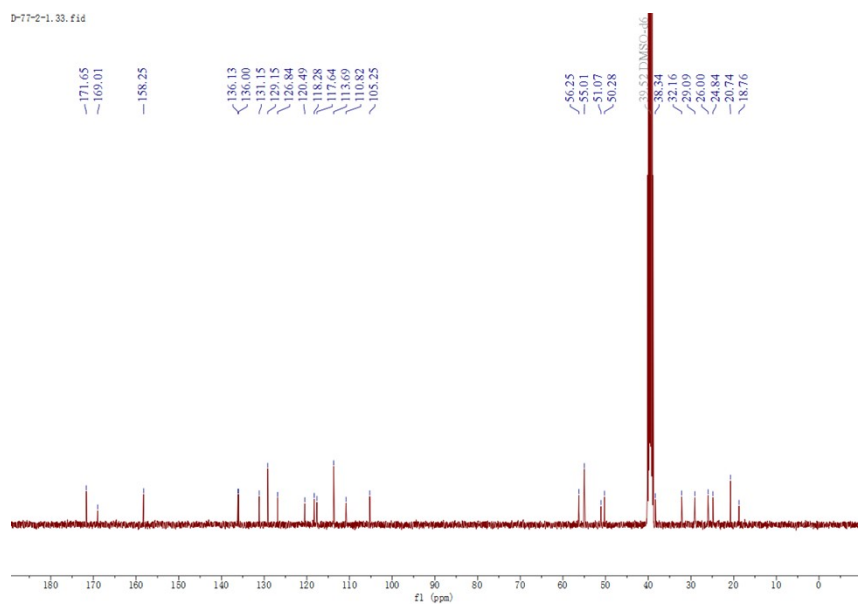

(1*S*, 3*R*)-*N*-(7-(hydroxyamino)-7-oxoheptyl)-2-(4-methoxybenzyl)-1-methyl-2, 3, 4, 9-tetrahydro-1*H*-pyrido[3, 4-*b*]indole-3-carboxamide (**13f**)

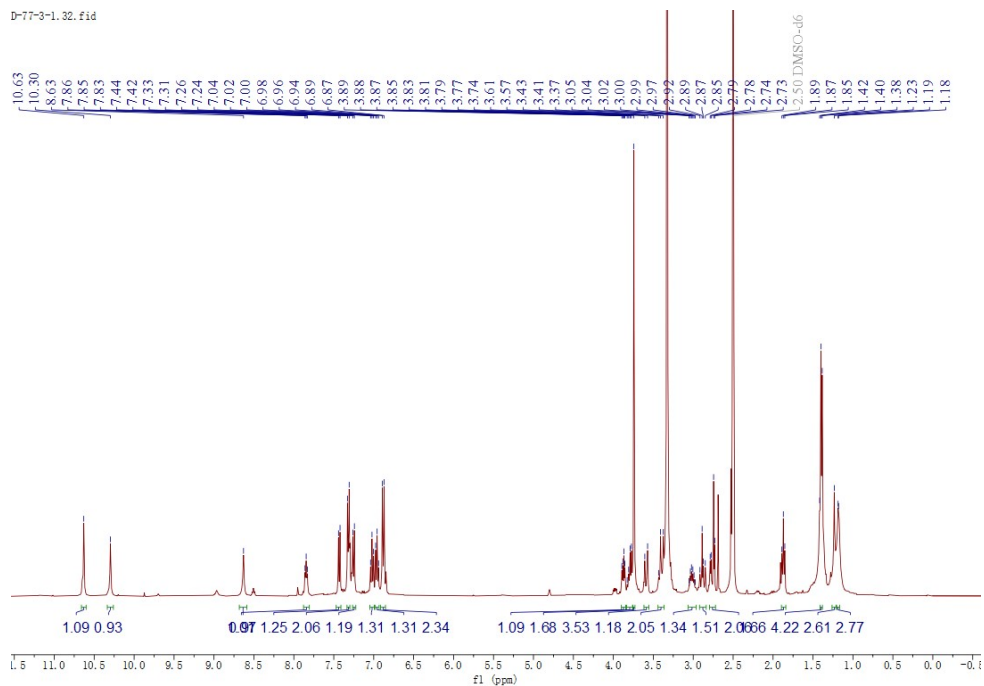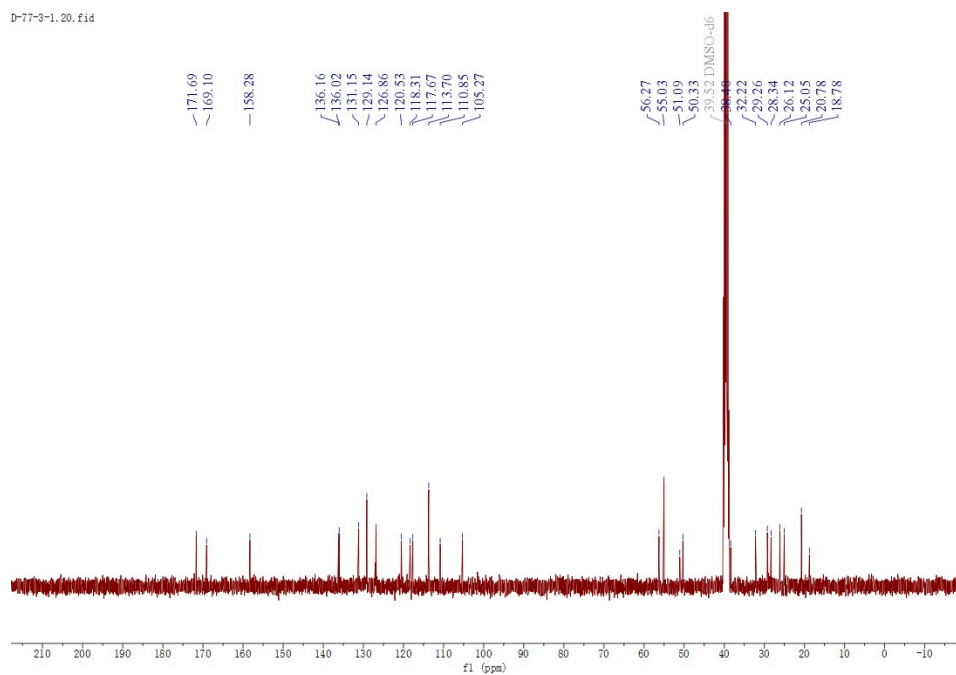



(1*S*, 3*R*)-2-benzyl-1-cyclopropyl-*N*-(7-(hydroxyamino)-7-oxoheptyl)-2, 3, 4, 9-tetrahydro-1*H*-pyrido[3, 4-*b*]indole-3-carboxamide (**13g**)

D-4-36-2-1.10.fid

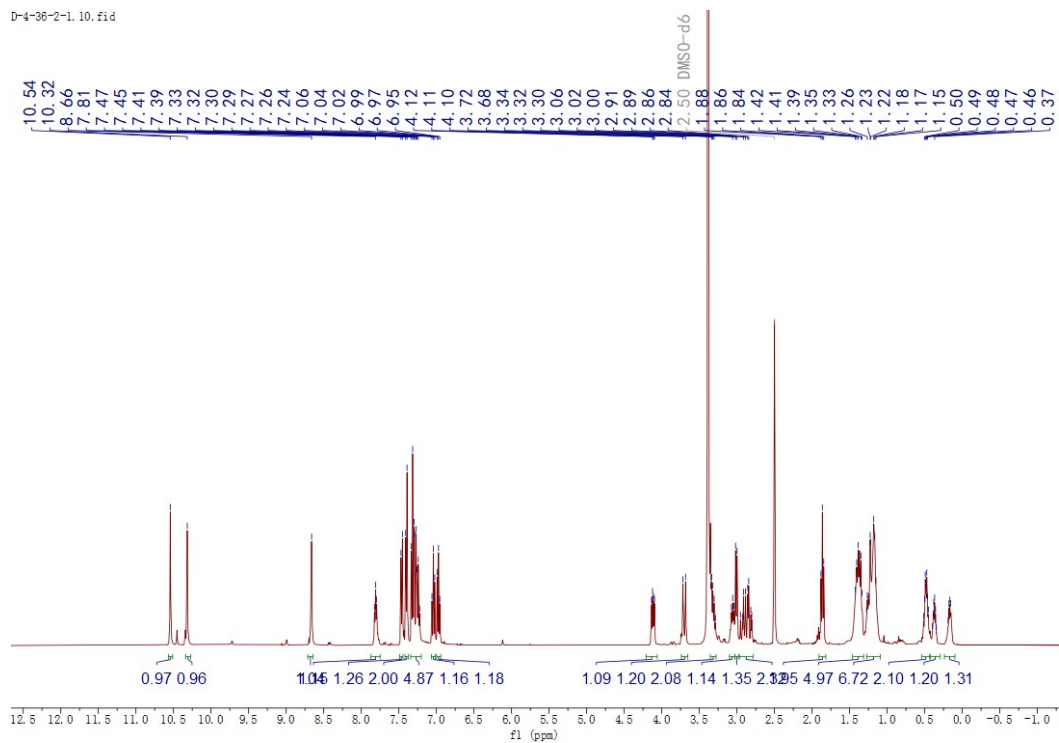

D-4-36-2-1.20.fid

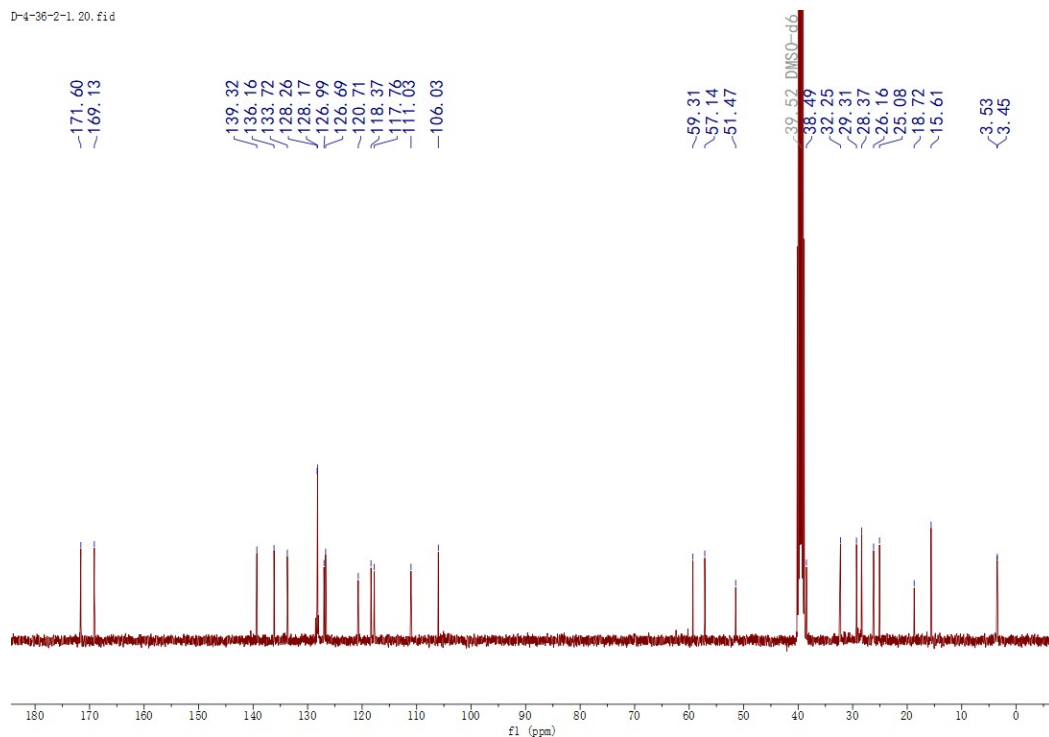

(1*S*, 3*R*)-1-(4-chlorophenyl)-*N*-(6-(hydroxyamino)-6-oxohexyl)-2, 3, 4, 9-tetrahydro-1*H*-pyrido[3, 4-*b*]indole-3-carboxamide (**13h**)

D-4-7-2-1.10.fid

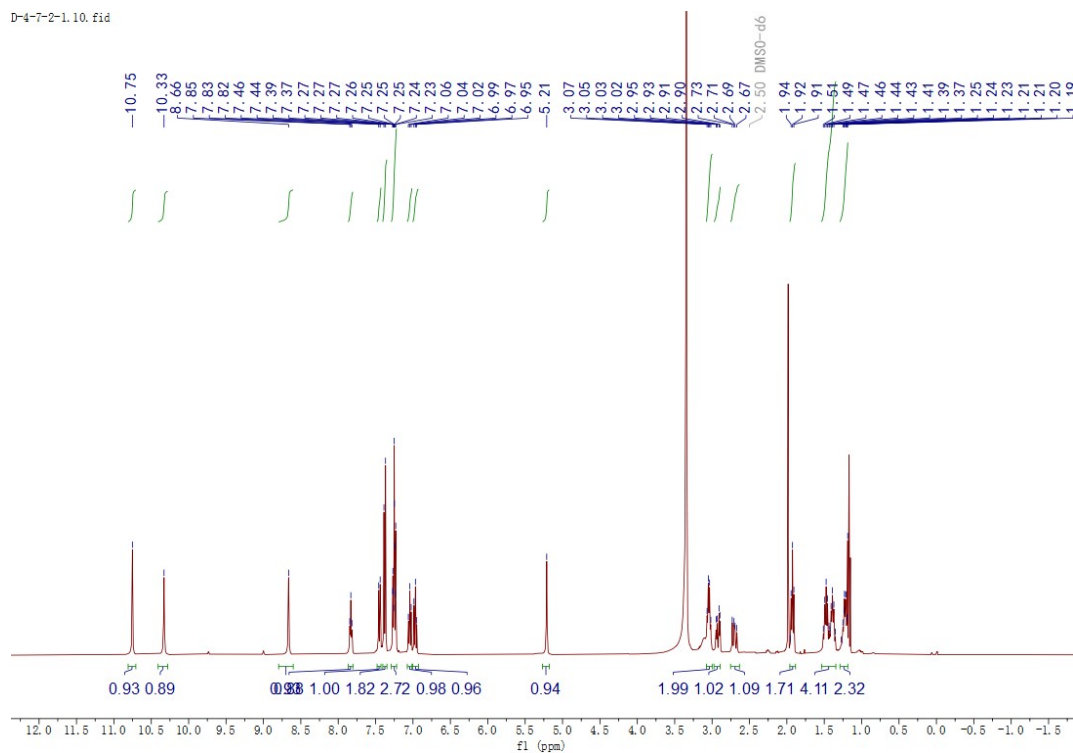

D-4-7-2-1.20.fid

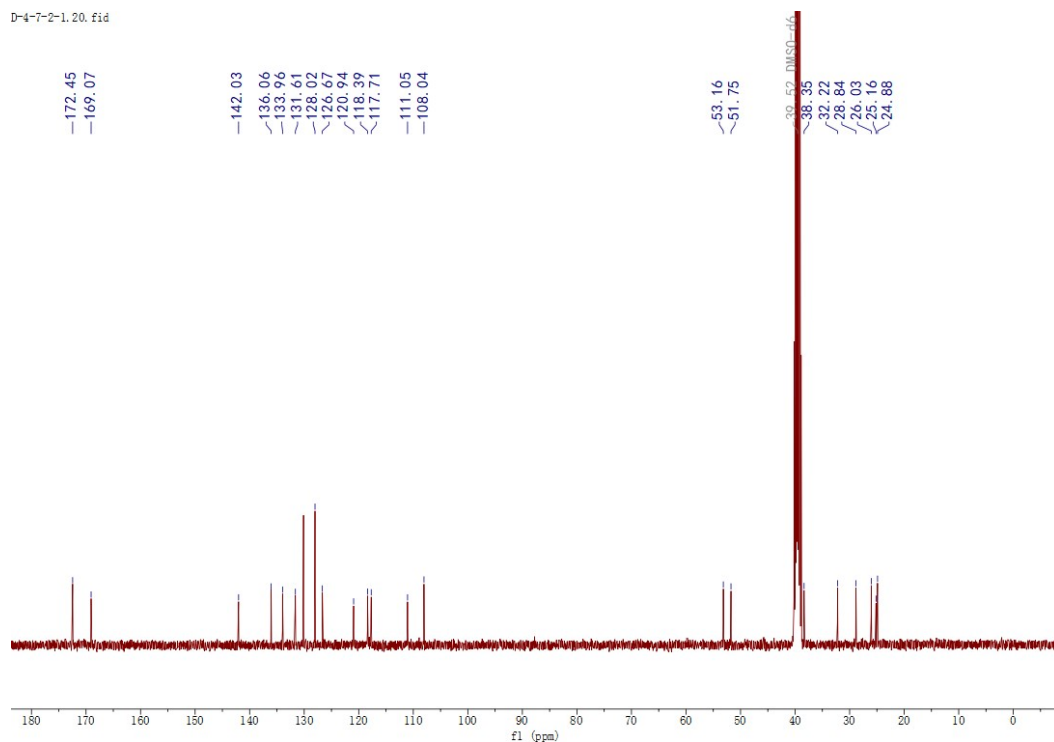

(1*S*, 3*R*)-1-(4-chlorophenyl)-*N*-(7-(hydroxyamino)-7-oxoheptyl)-2, 3, 4, 9-tetrahydro-1*H*-pyrido[3, 4-*b*]indole-3-carboxamide (**13i**)

D-4-10-1-1.10.fid

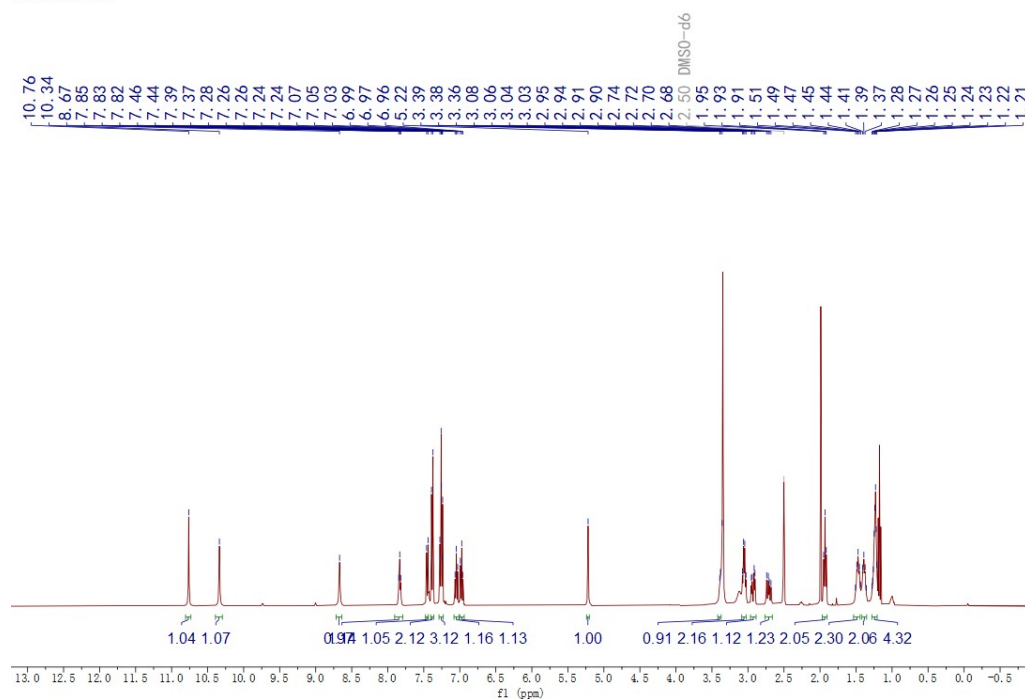

D-4-10-1-1.20.fid

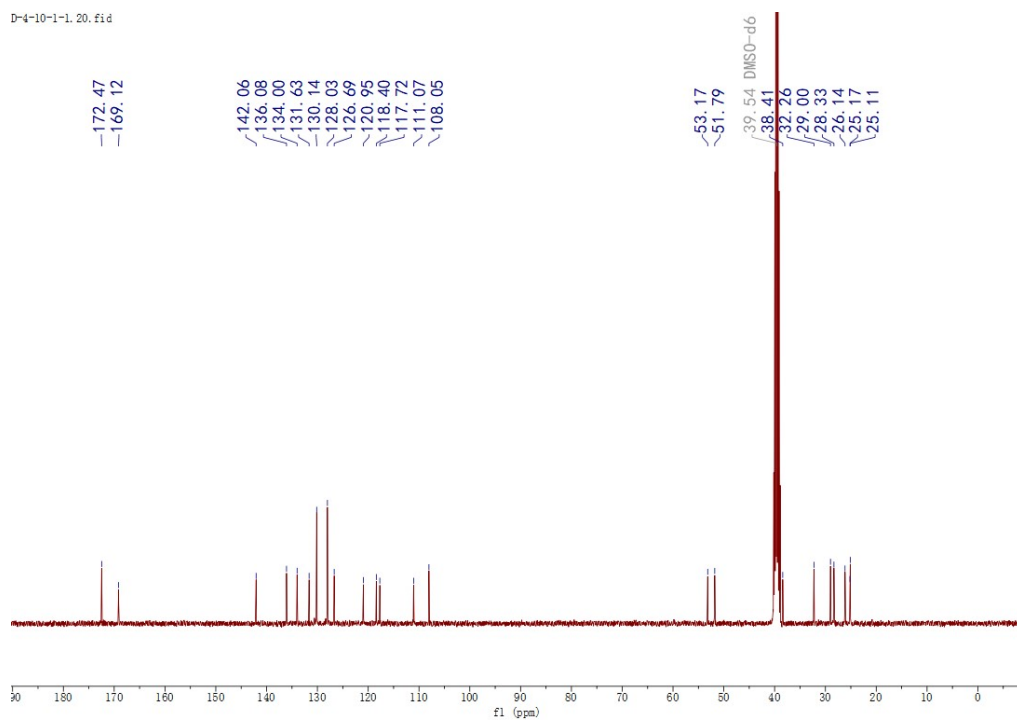

(1*S*, 3*R*)-1-(3, 4-dimethoxyphenyl)-*N*-(7-(hydroxyamino)-7-oxoheptyl)-2, 3, 4, 9-tetrahydro-1*H*-pyrido[3, 4-*b*]indole-3-carboxamide (**13j**)

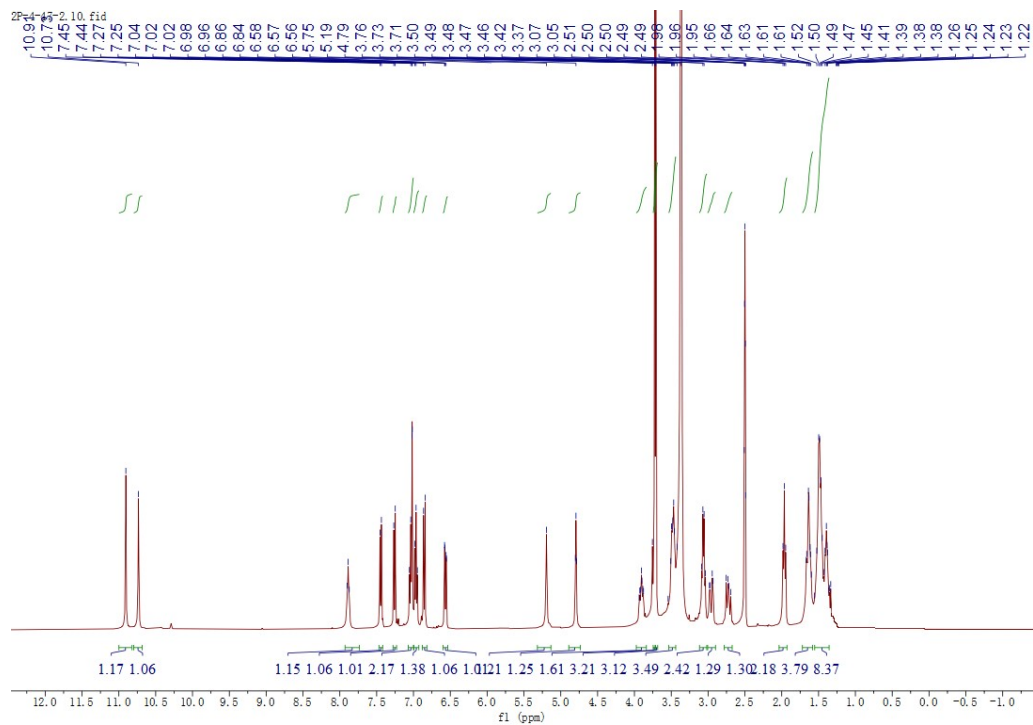

D-4-47-2-1.20.fid

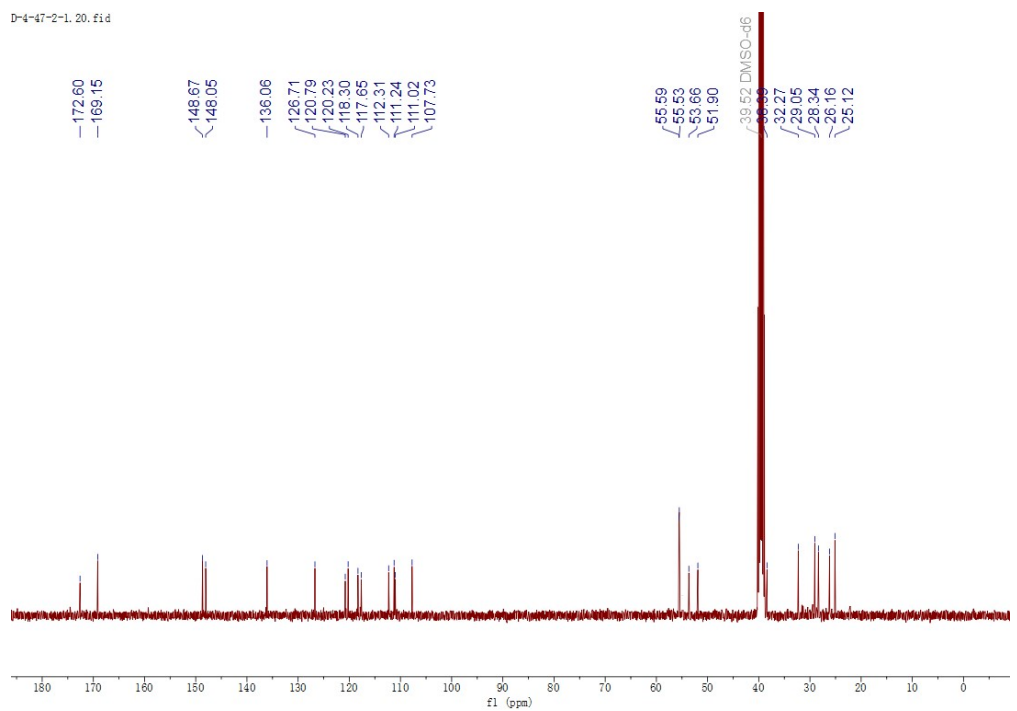

The growth percent of **13d** in NCI-60 program

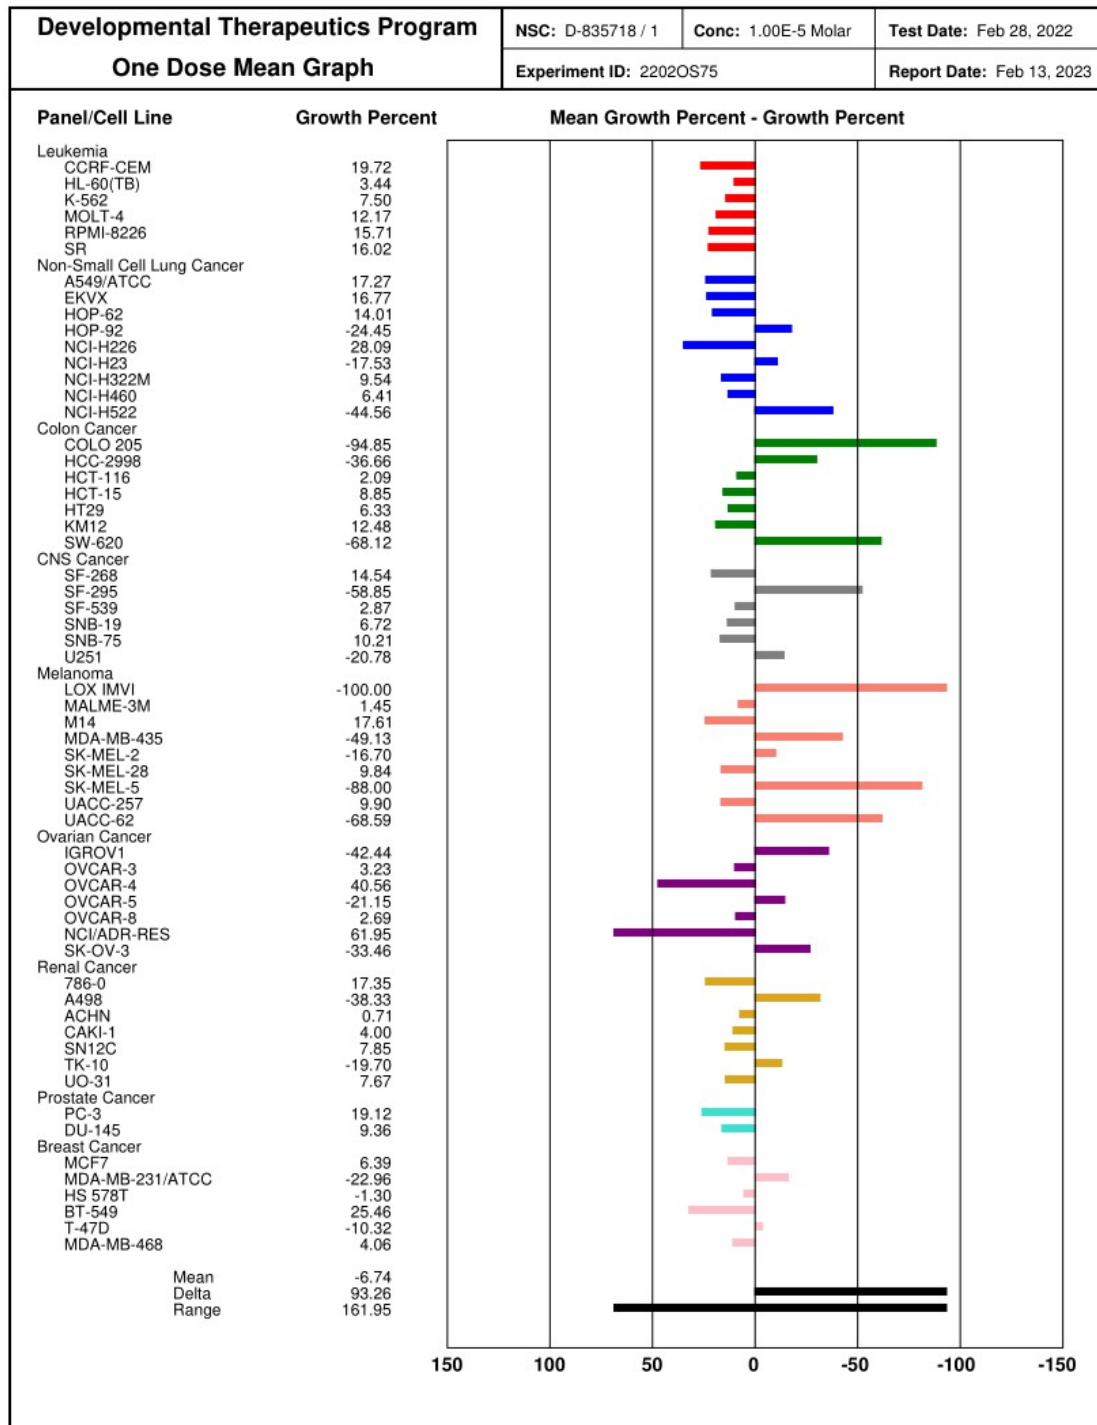

Supplement: d4ra01672f1.pdf [file d4ra01672f1.pdf]
